# Supplementary material for: The performance and mechanism of persulfate activated by CuFe-LDHs for ofloxacin degradation in water
Source: Royal Society of Chemistry journal article supplement (doi:10.1039/d4en00370e), 2024-01-01
Supplement: d4en00370e1.pdf [file d4en00370e1.pdf]

## Supplementary Information

### **The performance and mechanism of persulfate activated by CuFe-LDHs for ofloxacin degradation in water**

*Xue Zhang<sup>a,1</sup>, Kang Zhang<sup>a,1</sup>, Ting Li<sup>a,b</sup>, Yujiao Wang<sup>a,b</sup>, Yin Xu<sup>a,b,\*</sup>*

<sup>a</sup> Department of Environment, College of Environment and Resources, Xiangtan University, Xiangtan, Hunan 411105, P. R. China

<sup>b</sup> Hunan Key Lab for Environmental Behavior of New Pollutants and Control Principle, Hunan 411105, P. R. China

<sup>1</sup> Both authors contributed equally to the manuscript

\* Authors to whom correspondence should be addressed:

Dr. Yin Xu, Tel: +86 (731)5829-2231; E-mail: xuyin@xtu.edu.cn

### Text S1 Chemicals

The reagents used in this study were analytically pure. Ofloxacin (OFL), NaCl, Cu(NO<sub>3</sub>)<sub>2</sub>·3H<sub>2</sub>O, 5,5-dimethyl-1-pyrrolidine-N-oxide (DMPO) and humic acid (HA) were purchased from Shanghai Macklin Biochemical Co., Ltd. Fe(NO<sub>3</sub>)<sub>3</sub>·9H<sub>2</sub>O and NaOH were purchased from Xilong Scientific Co., Ltd. Na<sub>2</sub>S<sub>2</sub>O<sub>8</sub>, Na<sub>2</sub>SO<sub>4</sub>, NaH<sub>2</sub>PO<sub>4</sub> and NaNO<sub>3</sub> purchased from Sinopharm Chemical Reagent Co., Ltd. Na<sub>2</sub>CO<sub>3</sub> was purchased from Tianjin Fengchuan Chemical Reagent Co., Ltd. NaHCO<sub>3</sub>, methanol (MeOH), tert-butanol (TBA) were purchased from Tianjin Kemiou Chemical Reagents Co., Ltd. p-benzoquinone (p-BQ) was purchased from Tianjin Hengxing Chemical Reagent Co., Ltd.

**Text S2** The related calculation formulas of free radical contribution ratio.

$$R_{HO\cdot} = \frac{\eta_0 - \eta_{TBA}}{\eta_0} \times 100\% \quad (1)$$

$$R_{SO_4^{\cdot-}} = \frac{\eta_0 - \eta_{MeOH}}{\eta_0} \times 100\% - R_{HO\cdot} \quad (2)$$

$$R_{O_2^{\cdot-}} = \frac{\eta_0 - \eta_{BQ}}{\eta_0} \times 100\% - R_{HO\cdot} \quad (3)$$

Where  $R_{HO\cdot}$ ,  $R_{SO_4^{\cdot-}}$ , and  $R_{O_2^{\cdot-}}$  were the contribution ratio of HO·, SO<sub>4</sub><sup>·-</sup>, O<sub>2</sub><sup>·-</sup> (%);  $\eta_0$  was the degradation rate of OFL at 120 min with no quencher,  $\eta_{TBA}$ ,  $\eta_{MeOH}$ , and  $\eta_{BQ}$  were the degradation rate of OFL at 120 min under different quenchers (%).

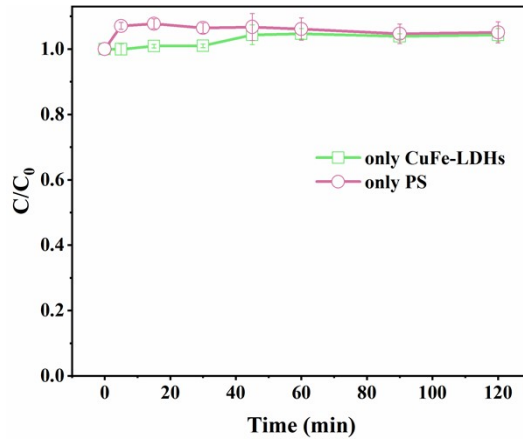

**Fig. S1** The OFL degradation efficiency when only CuFe-LDHs or PS was existed.

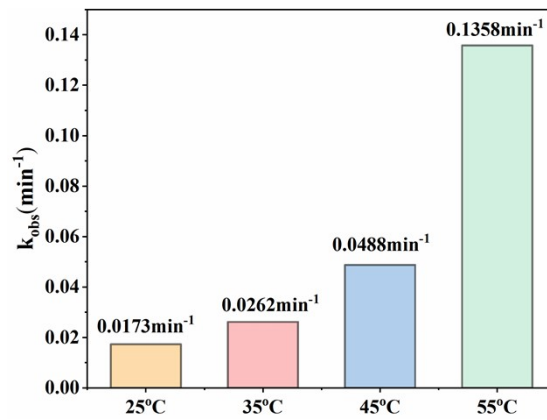

**Fig. S2** The  $k_{obs}$  values of OFL degradation with the variation of temperature.

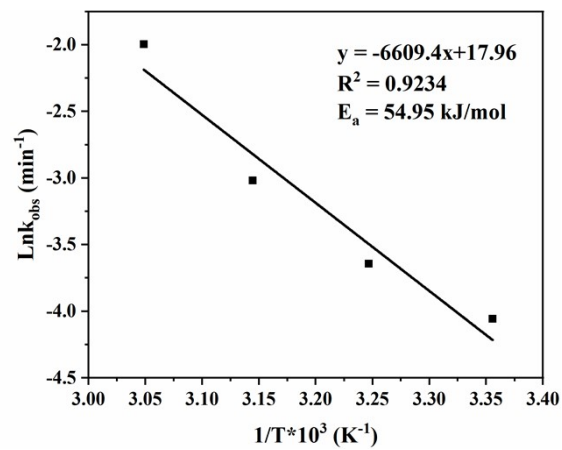

**Fig. S3** The relationship between  $\ln k_{obs}$  and  $1/T$ .

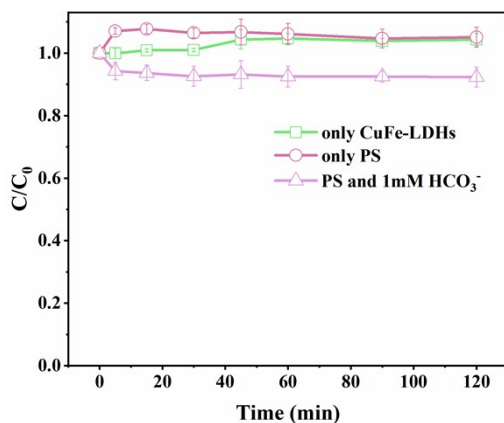

**Fig. S4** The OFL degradation performance in the presence of PS and 1 mM HCO<sub>3</sub><sup>-</sup>.

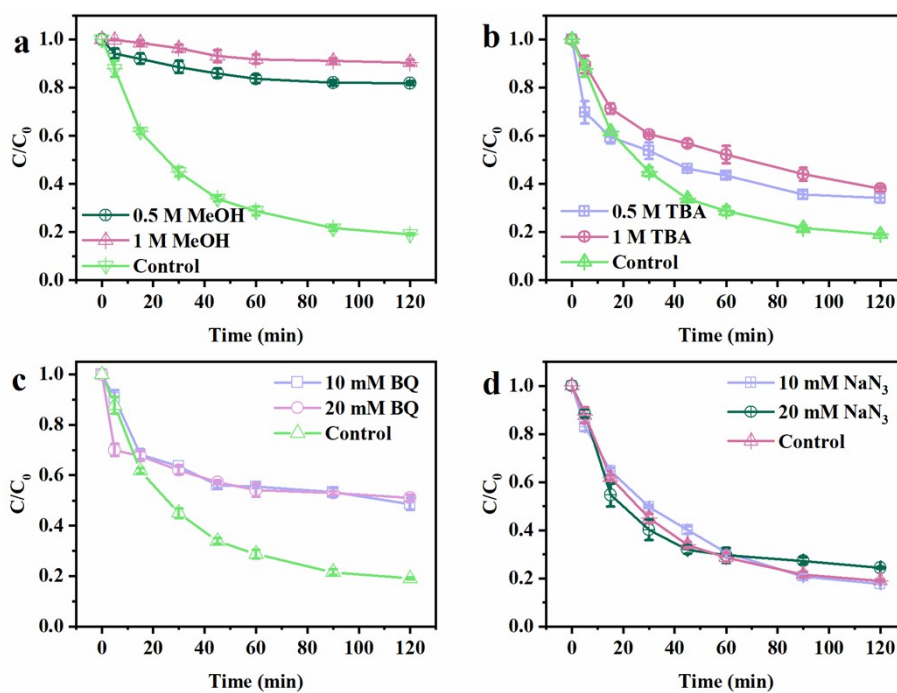

**Fig. S5** The experiment of radical scavenger concentration gradients: (a) MeOH, (b) TBA, (c) BQ, (d) NaN<sub>3</sub> (Condition: [CuFe-LDHs]=0.5 g/L, [PS]=0.2 mM. initial pH=5.9±0.1, T=25°C).

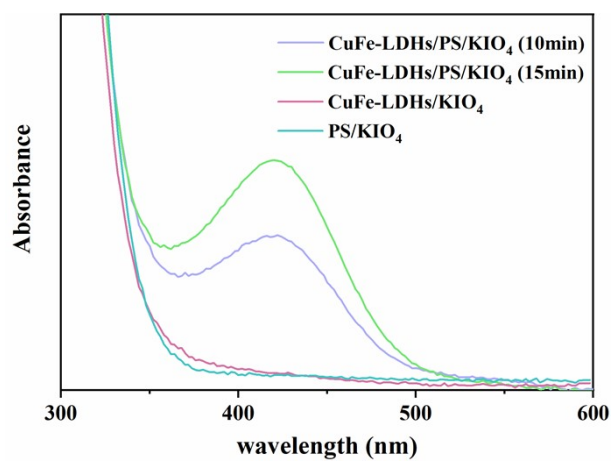

**Fig. S6** The ultraviolet-visible absorption spectra of periodate-Cu(III) complex.

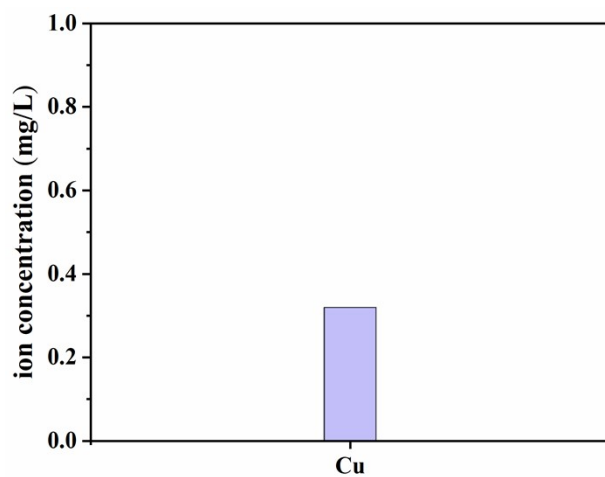

**Fig. S7** The dissolution of Cu ion in the CuFe-LDHs/PS/OFL system after five cycles.

**Table S1** The BET data of CuFe-LDHs.

| Specific surface area (m <sup>2</sup> /g) | Pore volume (cm <sup>3</sup> /g) | Aperture (nm) |
|-------------------------------------------|----------------------------------|---------------|
| 207.88                                    | 0.304                            | 29.22         |

**Table S2** The conditions of OFL degradation by different catalysts for activating PS.

| Catalysts                           | OFL concentration (mg/L) | Dosage (g/L) | PS concentration (mM) | Time (min) | Degradation efficiency (%) | pH range | Ref       |
|-------------------------------------|--------------------------|--------------|-----------------------|------------|----------------------------|----------|-----------|
| FeCu-gC <sub>3</sub> N <sub>4</sub> | 10                       | 0.3          | 1.3                   | 120        | 91                         | 3.1-9.0  | 1         |
| Cu-Fe oxide                         | 10                       | 0.5          | 15                    | 30         | 96.2                       | 6-10     | 2         |
| MnCeO <sub>x</sub>                  | 20                       | 0.8          | 1                     | 120        | 83                         | 5-9      | 3         |
| Mn-CuO                              | 10                       | 0.5          | 1                     | 20         | 98                         | 6-10     | 4         |
| BaTiO <sub>3</sub> /WS <sub>2</sub> | 20                       | 1            | 10                    | 75         | 90                         | 2-6.5    | 5         |
| CuFe-LDHs                           | 10                       | 0.5          | 0.2                   | 120        | 81                         | 3-11     | This work |

**Table S3** The E<sub>a</sub> values for PS activation in various catalytic systems.

| Catalytic systems                         | E <sub>a</sub> (kJ/mol) | References |
|-------------------------------------------|-------------------------|------------|
| FeCo-LDHs/PS                              | 59.71                   | 6          |
| CoFe <sub>2</sub> O <sub>4</sub> /TNTs/PS | 70.56                   | 7          |
| Fe <sub>2</sub> O <sub>3</sub> /PS        | 69.225                  | 7          |
| Heat/PS                                   | 107.4                   | 8          |
| Heat/PS                                   | 102.64                  | 9          |
| Heat/NZVC/PS                              | 67.40                   | 10         |
| VIS/5H-M-101(Fe)/PS                       | 67.63                   | 11         |
| CuFe-LDHs/PS                              | 54.95                   | This work  |

**Table S4** The anions concentration in rain water.

| anion                | SO <sub>4</sub> <sup>2-</sup> | Cl <sup>-</sup> | NO <sub>3</sub> <sup>-</sup> |
|----------------------|-------------------------------|-----------------|------------------------------|
| Concentration (mg/L) | 0.6504                        | 0.0929          | 0.7414                       |

## References

1. Y. Y. Tian, Q. Li, M. Zhang, Y. L. Nie, X. K. Tian, C. Yang and Y. Li, pH-dependent oxidation mechanisms over FeCu doped g-C<sub>3</sub>N<sub>4</sub> for ofloxacin degradation via the efficient peroxymonosulfate activation, *Journal of Cleaner Production*, 2021, **315**, 128207.
2. Q. Wang, B. B. Wang, Y. Ma and S. T. Xing, Enhanced superoxide radical production for ofloxacin removal via persulfate activation with Cu-Fe oxide, *Chem. Eng. J.*, 2018, **354**, 473-480.
3. L. J. Niu, G. Xian, Z. Q. Long, G. M. Zhang, J. Zhu and J. W. Li, MnCeO<sub>x</sub> with high efficiency and stability for activating persulfate to degrade AO7 and ofloxacin, *Ecotoxicol. Environ. Saf.*, 2020, **191**, 110228.
4. B. Liu, Y. M. Li, Y. S. Wu and S. T. Xing, Enhanced degradation of ofloxacin by persulfate activation with Mn doped CuO: Synergetic effect between adsorption and non-radical activation, *Chem. Eng. J.*, 2021, **417**, 127972.
5. A. Fazli, F. Zakeri, A. Khataee and Y. Orooji, A BaTiO<sub>3</sub>/WS<sub>2</sub> composite for piezo-photocatalytic persulfate activation and ofloxacin degradation, *Communications Chemistry*, 2022, **5**, 95.
6. C. Gong, F. Chen, Q. Yang, K. Luo, F. B. Yao, S. N. Wang, X. L. Wang, J. W. Wu, X. M. Li, D. B. Wang and G. M. Zeng, Heterogeneous activation of peroxymonosulfate by Fe-Co layered doubled hydroxide for efficient catalytic degradation of Rhoadmine B, *Chem. Eng. J.*, 2017, **321**, 222-232.
7. Y. C. Du, W. J. Ma, P. X. Liu, B. H. Zou and J. Ma, Magnetic CoFe<sub>2</sub>O<sub>4</sub> nanoparticles supported on titanate nanotubes (CoFe<sub>2</sub>O<sub>4</sub>/TNTs) as a novel heterogeneous catalyst for peroxymonosulfate activation and degradation of organic pollutants, *J. Hazard. Mater.*, 2016, **308**, 58-66.
8. C. S. Ding, Z. Y. Cai, C. K. Hu, J. Lei, L. Wang, Q. S. Li, X. Y. Li and J. Deng, Degradation of antiviral drug acyclovir by thermal activated persulfate process: Kinetics study and modeling, *Chemosphere*, 2023, **323**, 138247.
9. T. T. Li, S. Lu, W. W. Lin, H. J. Ren and R. Zhou, Heat-activated persulfate oxidative degradation of ofloxacin: Kinetics, mechanisms, and toxicity assessment, *Chem. Eng. J.*, 2022, **433**, 133801.
10. J. Deng, M. Y. Xu, Y. J. Chen, J. Li, C. E. Qiu, X. Y. Li and S. Q. Zhou, Highly-efficient removal of norfloxacin with nanoscale zero-valent copper activated persulfate at mild temperature, *Chem. Eng. J.*, 2019, **366**, 491-503.

11. G. Y. Cheng, C. Yuan, W. S. Ruan, B. Ma, X. Y. Zhang, X. J. Yuan, Z. H. Li, D. Wang and F. Teng, Visible light enhanced persulfate activation for degradation of tetracycline boosting adsorption of persulfate by ligand-deficient MIL-101 (Fe) icosahedron, *Chemosphere*, 2023, **317**, 137857.
